# Supplementary material for: Integrated metabolomics and transcriptomics reveal the anti-aging effect of melanin from Sepiella maindroni ink (MSMI) on D-galactose-induced aging mice
Source: publisher site journal article supplement (doi:10.18632/aging.202890), 2021-04-21
Supplement: Supplementary file [file aging-v13i8-202890-supplementary-material-SD1.pdf]

## SUPPLEMENTARY FIGURE

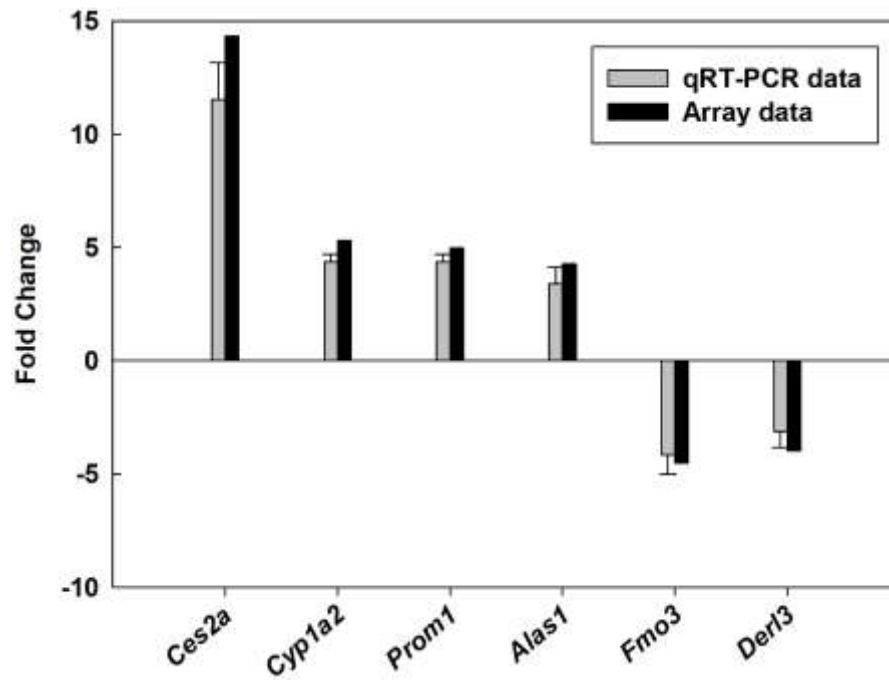

**Supplementary Figure 1. Microarray validation by real-time PCR.** The expression levels of genes *Ces2a*, *Cyp1a2*, *Fmo3*, *Alas1*, *Prom1*, and *Derl3* from gene array analysis compared with that of real-time PCR.
