# Supplementary material for: Integrated metabolomics and transcriptomics reveal the anti-aging effect of melanin from Sepiella maindroni ink (MSMI) on D-galactose-induced aging mice
Source: publisher site journal article supplement (doi:10.18632/aging.202890), 2021-04-21
Supplement: Supplementary file [file aging-v13i8-202890-supplementary-material-SD2.pdf]

## SUPPLEMENTARY TABLES

**Supplementary Table 1. The differentially expressed mRNAs in MT group compared with DM group.**

| <b>ProbeName</b> | <b>p-value</b> | <b>Fold Change</b> | <b>Regulation</b> | <b>Symbol</b>  | <b>Gene.ID</b> |
|------------------|----------------|--------------------|-------------------|----------------|----------------|
| A_55_P2293013    | 0.0493         | 14.3262            | up                | <i>Ces2a</i>   | 102022         |
| A_51_P327751     | 0.0070         | 5.6606             | up                | <i>Ifit1</i>   | 15957          |
| A_66_P128537     | 0.0042         | 5.5516             | up                | <i>Isg15</i>   | 100038880      |
| A_52_P595871     | 0.0076         | 5.3079             | up                | <i>Cyp1a2</i>  | 13077          |
| A_52_P402786     | 0.0365         | 4.9779             | down              | <i>Prom1</i>   | 19126          |
| A_51_P269404     | 0.0118         | 4.5178             | up                | <i>Fmo3</i>    | 14262          |
| A_55_P2083649    | 0.0088         | 4.2690             | up                | <i>Alas1</i>   | 11655          |
| A_51_P359570     | 0.0164         | 4.0861             | up                | <i>Ifit3</i>   | 15959          |
| A_51_P491667     | 0.0013         | 3.9660             | down              | <i>Derl3</i>   | 70377          |
| A_55_P2107775    | 0.0096         | 3.9027             | up                | <i>Apol9a</i>  | 223672         |
| A_51_P377856     | 0.0005         | 3.5075             | up                | <i>Gstt3</i>   | 103140         |
| A_55_P2102060    | 0.0139         | 2.9184             | up                | <i>Gstm3</i>   | 14864          |
| A_55_P1966438    | 0.0045         | 2.6146             | up                | <i>Gstm2</i>   | 14863          |
| A_51_P503625     | 0.0068         | 2.5512             | up                | <i>Gsta3</i>   | 14859          |
| A_65_P02177      | 0.0024         | 2.5473             | up                | <i>Gstm4</i>   | 14865          |
| A_55_P1966432    | 0.0068         | 2.4931             | up                | <i>Gstm1</i>   | 14862          |
| A_55_P2065231    | 0.0036         | 2.4913             | up                | <i>Gstm3</i>   | 14864          |
| A_51_P367866     | 0.0311         | 2.3314             | down              | <i>Egr1</i>    | 13653          |
| A_55_P2077628    | 0.0048         | 2.1923             | up                | <i>Dcxr</i>    | 67880          |
| A_55_P1961423    | 0.0126         | 2.1791             | up                | <i>Gsta3</i>   | 14859          |
| A_51_P284486     | 0.0022         | 2.0296             | up                | <i>Gstm2</i>   | 14863          |
| A_55_P2147136    | 0.0080         | 1.8937             | up                | <i>Akr1d1</i>  | 208665         |
| A_51_P138044     | 0.0199         | 1.8759             | up                | <i>Foxo1</i>   | 56458          |
| A_51_P132978     | 0.0223         | 1.7969             | up                | <i>Idh1</i>    | 15926          |
| A_55_P2002893    | 0.0346         | 1.7207             | up                | <i>Pfkfb1</i>  | 18639          |
| A_55_P2012974    | 0.0232         | 1.5369             | up                | <i>Sdha</i>    | 66945          |
| A_52_P200359     | 0.0064         | 1.5185             | up                | <i>Aco2</i>    | 11429          |
| A_51_P393897     | 0.0319         | 1.5009             | up                | <i>Mpi</i>     | 110119         |
| A_51_P335419     | 0.0050         | 1.4977             | up                | <i>Csl</i>     | 71832          |
| A_55_P1953980    | 0.0411         | 1.4949             | up                | <i>Sdhb</i>    | 67680          |
| A_51_P337269     | 0.0449         | 1.4874             | up                | <i>Aldob</i>   | 230163         |
| A_51_P290139     | 0.0099         | 1.4839             | up                | <i>Dlst</i>    | 78920          |
| A_55_P2146780    | 0.0161         | 1.4751             | up                | <i>Sdhc</i>    | 66052          |
| A_51_P130110     | 0.0360         | 1.4560             | up                | <i>Idh3b</i>   | 170718         |
| A_51_P184284     | 0.0106         | 1.4417             | up                | <i>Dld</i>     | 13382          |
| A_51_P445662     | 0.0120         | 1.4218             | up                | <i>Hsd17b4</i> | 15488          |
| A_52_P43150      | 0.0152         | 1.3433             | up                | <i>Baat</i>    | 12012          |
| A_55_P1988424    | 0.0202         | 1.3282             | up                | <i>Tpi1</i>    | 21991          |
| A_51_P172573     | 0.0293         | 1.3242             | up                | <i>Sod2</i>    | 20656          |
| A_52_P600822     | 0.2236         | 1.3220             | up                | <i>Prkecz</i>  | 18762          |
| A_51_P409893     | 0.0221         | 1.3214             | up                | <i>Prkar2a</i> | 19087          |
| A_55_P1970670    | 0.0309         | 1.2969             | up                | <i>Scp2</i>    | 20280          |
| A_51_P276063     | 0.0318         | 1.2544             | up                | <i>Phyh</i>    | 16922          |
| A_55_P2148873    | 0.0336         | 1.2515             | up                | <i>Cat</i>     | 12359          |
| A_51_P117995     | 0.0340         | 1.2481             | up                | <i>Pfkm</i>    | 18642          |
| A_51_P110888     | 0.0490         | 1.2452             | down              | <i>Pck2</i>    | 74551          |

The differentially expressed mRNAs discussed in this study are listed in the table. The full list of 2801 differentially expressed mRNAs can be obtained from the contact author.

**Supplementary Table 2. Metabolites detected and identified by GC/MS in MT group compared with DM group. Metabolites which VIP > 1 and p-value < 0.05 have been shown in Supplementary Table 2. If the value of log2 fold change is positive, the content of that metabolite in MT group is greater than DM group, If the value of log2 fold change is negative, the content of that metabolite in MT group is less than DM group.**

| Metabolites                        | RetentionTime | m/z | VIP      | p-value  | Fold change | log2 fold change |
|------------------------------------|---------------|-----|----------|----------|-------------|------------------|
| (-)-Dihydrocarveol                 | 10.7197       | 180 | 2.781200 | 0.015461 | 0.195113    | -2.357615        |
| 1-Kestose                          | 29.3104       | 204 | 1.557960 | 0.020102 | 3.066278    | 1.616489         |
| 21-hydroxypregnenolone 1           | 28.0997       | 243 | 3.370050 | 0.000286 | 0.215912    | -2.211485        |
| 2-amino-2-methylpropane-1,3-diol 1 | 10.7711       | 155 | 2.572560 | 0.027227 | 0.183154    | -2.448871        |
| 2'-deoxyadenosine 5'-monophosphate | 27.3751       | 169 | 2.798090 | 0.005003 | 0.378206    | -1.402758        |
| 3-hydroxybenzyl alcohol            | 12.9109       | 135 | 3.799540 | 0.001584 | 0.236527    | -2.079921        |
| 4-Androsten-11beta-ol-3,17-dione 4 | 26.6908       | 259 | 1.687070 | 0.013457 | 0.280722    | -1.832788        |
| 4-hydroxyphenylacetic acid         | 15.0040       | 177 | 2.454940 | 0.034226 | 0.173412    | -2.527727        |
| 4-Methylbenzyl alcohol             | 10.1250       | 130 | 2.721800 | 0.002808 | 0.000003    | -18.448369       |
| Acetol 4                           | 15.6426       | 97  | 1.614060 | 0.006122 | 0.382779    | -1.385416        |
| alpha-Santonin 1                   | 21.1897       | 105 | 3.031090 | 0.004159 | 1.65E+06    | 20.655095        |
| Aminomalonic acid                  | 12.9258       | 232 | 1.015300 | 0.004899 | 0.624170    | -0.679990        |
| Anandamide 2                       | 25.9614       | 91  | 1.117360 | 0.006817 | 0.495450    | -1.013190        |
| androsterone 1                     | 23.7097       | 91  | 3.305390 | 0.004738 | 0.234040    | -2.095171        |
| asparagine 3                       | 14.7457       | 244 | 1.961870 | 0.003549 | 0.462710    | -1.111818        |
| beta-hydroxypyruvate               | 10.9797       | 260 | 2.313570 | 0.015057 | 0.320784    | -1.640327        |
| D-(glycerol 1-phosphate)           | 16.3312       | 266 | 1.592740 | 0.037797 | 0.613434    | -0.705020        |
| D-galacturonic acid 2              | 18.2821       | 299 | 1.537300 | 0.044932 | 0.621460    | -0.686267        |
| Digitoxose 2                       | 14.5501       | 244 | 2.439590 | 0.031031 | 0.258178    | -1.953560        |
| dihydrocoumarin 1                  | 15.5767       | 217 | 2.377920 | 0.008405 | 22.517975   | 4.493005         |
| D-Talose 2                         | 17.9603       | 211 | 2.120540 | 0.007450 | 4.407770    | 2.140049         |
| flavin adenine degrad product      | 16.0677       | 191 | 3.786310 | 0.001679 | 0.202274    | -2.305614        |
| Gluconic lactone 1                 | 17.5683       | 204 | 3.352460 | 0.016084 | 4.226876    | 2.079592         |
| glutamic acid                      | 14.7319       | 257 | 1.025780 | 0.025270 | 0.403922    | -1.307851        |
| glutaraldehyde 3                   | 10.4367       | 85  | 2.147390 | 0.033205 | 3.115126    | 1.639291         |
| glycolic acid                      | 7.4198        | 103 | 1.078320 | 0.048699 | 0.571583    | -0.806966        |
| histidine 2                        | 18.0133       | 154 | 2.437710 | 0.024060 | 0.436661    | -1.195415        |
| hydrocinnamic acid                 | 12.3431       | 104 | 2.377290 | 0.001093 | 3.291242    | 1.718632         |
| mannitol                           | 18.0940       | 304 | 1.196990 | 0.017301 | 2.132601    | 1.092614         |
| mannose 2                          | 17.8777       | 367 | 3.113380 | 0.005807 | 2.70E+06    | 21.363729        |
| methyl trans-cinnamate             | 12.1706       | 103 | 1.533310 | 0.001448 | 2.113743    | 1.079800         |
| N-Acetyl-L-leucine 2               | 12.6438       | 156 | 1.906730 | 0.041585 | 0.535818    | -0.900186        |
| N-Methyl-L-glutamic acid 3         | 12.8749       | 98  | 1.102860 | 0.001963 | 0.559949    | -0.836631        |
| Octadecanol                        | 20.2316       | 328 | 1.522260 | 0.014993 | 2.314538    | 1.210724         |
| oxalic acid                        | 8.1371        | 190 | 3.197850 | 0.025987 | 0.387441    | -1.367950        |
| oxamic acid                        | 10.2087       | 171 | 3.429640 | 0.009827 | 2.65E+08    | 27.981225        |
| phosphate                          | 10.3103       | 158 | 5.607730 | 0.000002 | 0.109505    | -3.190938        |
| ribose-5-phosphate 1               | 19.5842       | 299 | 2.334980 | 0.028852 | 5.696613    | 2.510104         |
| Threitol                           | 13.3109       | 217 | 1.179820 | 0.020816 | 4.131765    | 2.046758         |
| tryptophan 1                       | 20.7595       | 202 | 1.295940 | 0.039507 | 0.475206    | -1.073376        |
| xanthine                           | 18.9413       | 243 | 1.717660 | 0.001189 | 1.915535    | 0.937747         |

**Supplementary Table 3. Primers used in qRT-PCR.**

| <b>Name</b> | <b>Sequence 5'-3'</b>     | <b>Application</b>            |
|-------------|---------------------------|-------------------------------|
| Alas1 F     | GGCTGTCATGGAGACTGTGAA     | for <i>Alas1</i> gene         |
| Alas1 R     | GCATTGGTGGCAAGGAGGT       | for <i>Alas1</i> gene         |
| ces2a F     | ACACAGCAGCACGGATGAT       | for <i>ces2a</i> gene         |
| ces2a R     | GGCAGAGTCTTGGTCCAGAA      | for <i>ces2a</i> gene         |
| Cyp1a2 F    | GCACTACCAAGACTTCAACAAGAA  | for <i>Cyp1a2</i> gene        |
| Cyp1a2 R    | GCAGGATGGCTAAGAAGAGGAA    | for <i>Cyp1a2</i> gene        |
| Derl3 F     | TTCTCTTCGGTGGTGTTCCTTATGA | for <i>Derl3</i> gene         |
| Derl3 R     | ATGGAGGCATAGGCAATGTGAA    | for <i>Derl3</i> gene         |
| Fmo3 F      | TCTGACTGGTGGTACACAAGG     | for <i>Fmo3</i> gene          |
| Fmo3 R      | TGTCTGGATGGTGGTGCTATT     | for <i>Fmo3</i> gene          |
| prom1F      | TAGCATCAGACCAAGCCTAAGC    | for <i>prom1</i> gene         |
| prom1R      | TCATAAGGTTTCGCAGAGCAACT   | for <i>prom1</i> gene         |
| GAPDH F     | ACCACAGTCCATGCCATCAC      | for control <i>GAPDH</i> gene |
| GAPDH R     | TCCACCACCTGTTGCTGTA       | for control <i>GAPDH</i> gene |
